# Supplementary material
Source: Springer Nature journal article supplement (https://www.springermedizin.de/resource/supplementary/12889_2011_3986_MOESM3_ESM.pdf/9491278)
Supplement: MOESM3 [file 9491278]

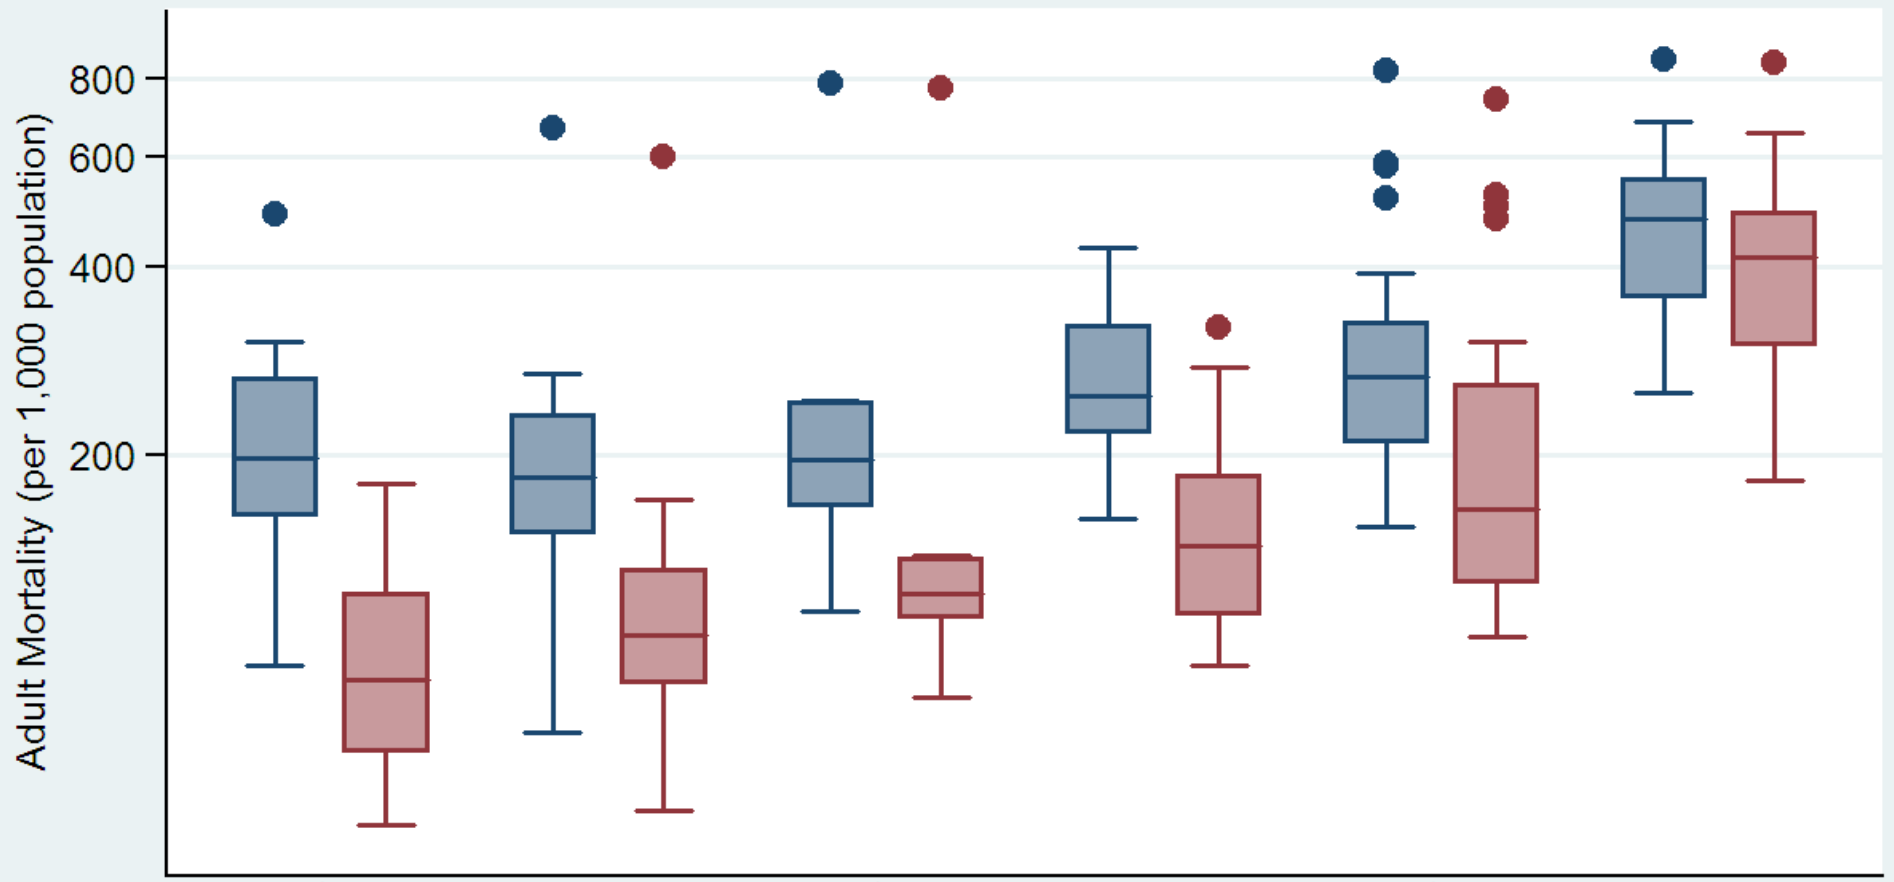

Prob. of dying per 1,000 pop. between 15-60 yrs (adult mortality), males, 2004  
 Prob. of dying per 1,000 pop. between 15-60 yrs (adult mortality), females, 2004
